# Supplementary material for: Notch mediates Wnt and BMP signals in the early separation of smooth muscle progenitors and blood/endothelial common progenitors
Source: Oxford University Press journal article supplement (doi:10.1242/dev.026906), 2009-01-23

Whole mount views of dENotch1 electroporated cells (red) and *Scf* or *dHAND* in situ (blue)

HH5 (*Scf* in situ)

HH5 (*dHAND* in situ)

HH7 (*dHAND* in situ)

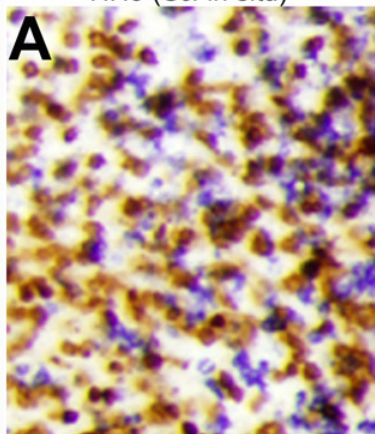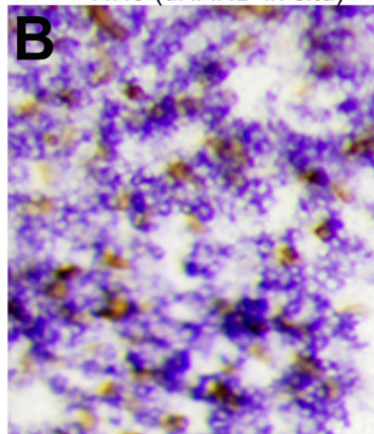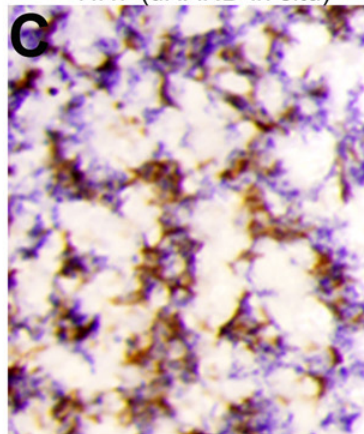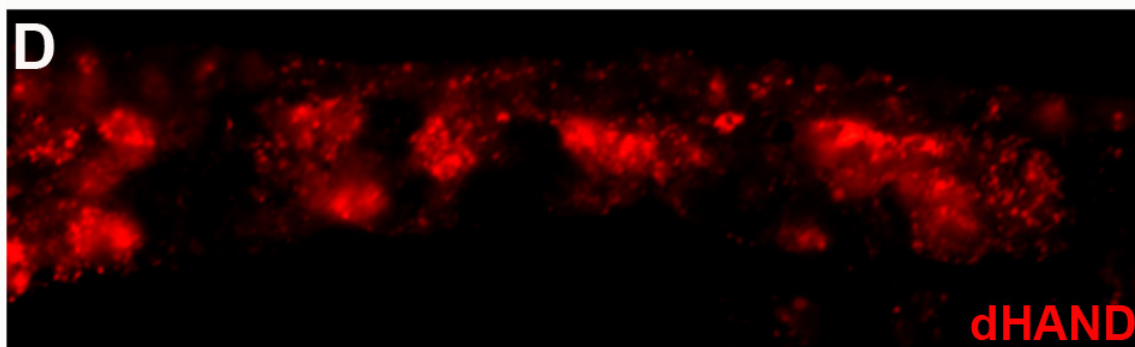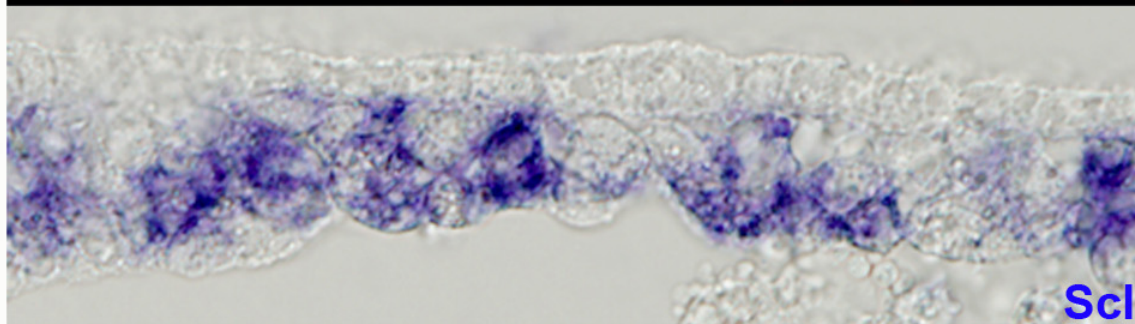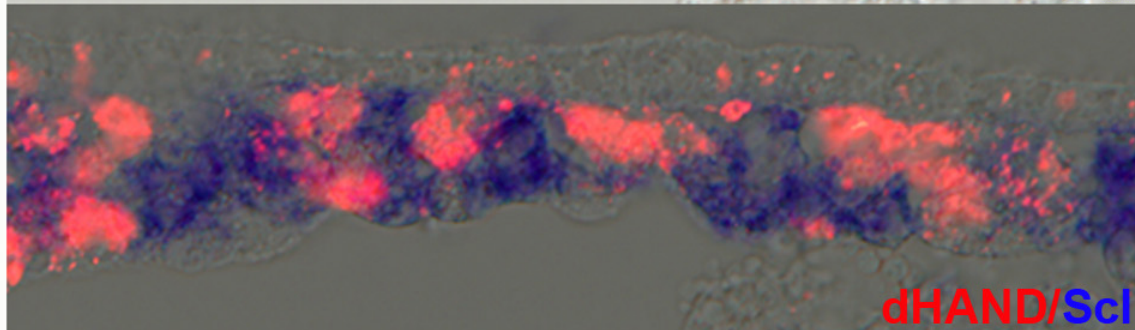

Supplement: dev026906-sup-026906-figs3.pdf [file dev026906-sup-026906-figs3.pdf]
