# Supplementary material for: Notch mediates Wnt and BMP signals in the early separation of smooth muscle progenitors and blood/endothelial common progenitors
Source: Oxford University Press journal article supplement (doi:10.1242/dev.026906), 2009-01-23

Section view of dENotch1 eletroporated embryo (HH5)

**A**

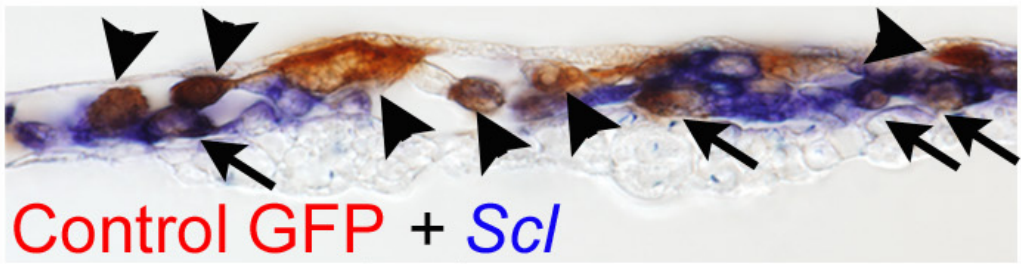

**B**

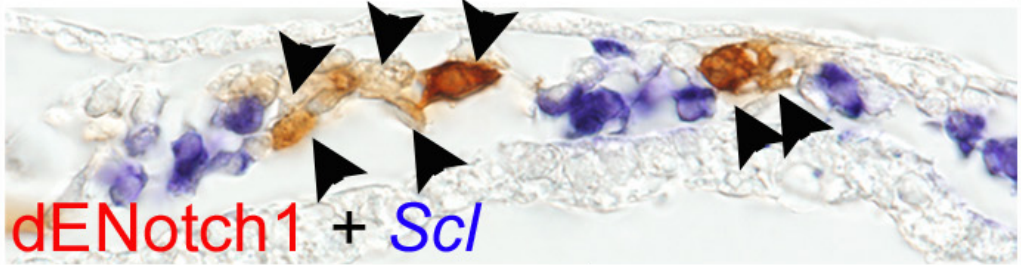

**C**

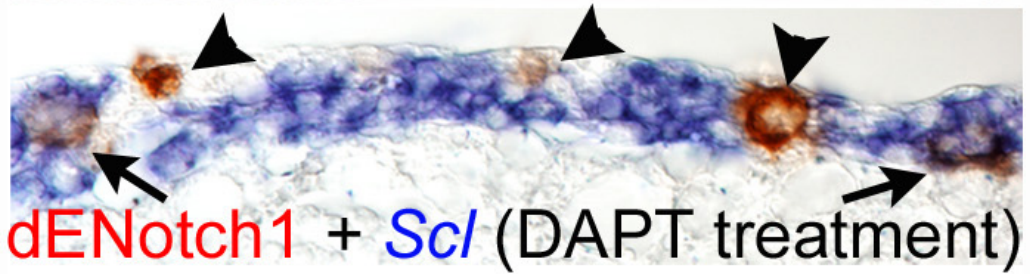

**D**

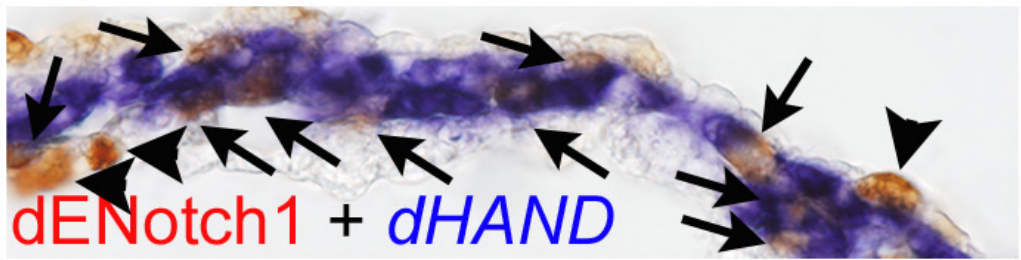

**E**

Section view of embryo (HH5) with *ScI* electroporation (brown) and *dHAND* in situ (blue)

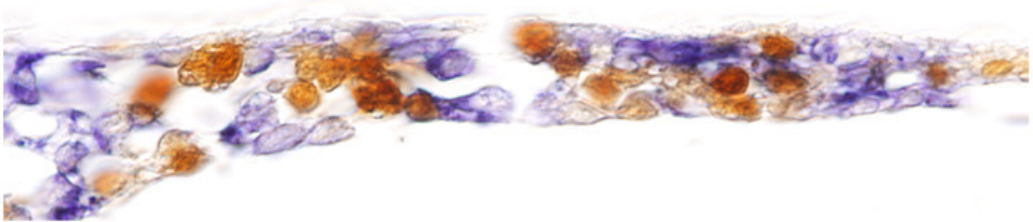

**F**

Section view of embryo (HH5) with *dHAND* electroporation (brown) and *ScI* in situ (blue)

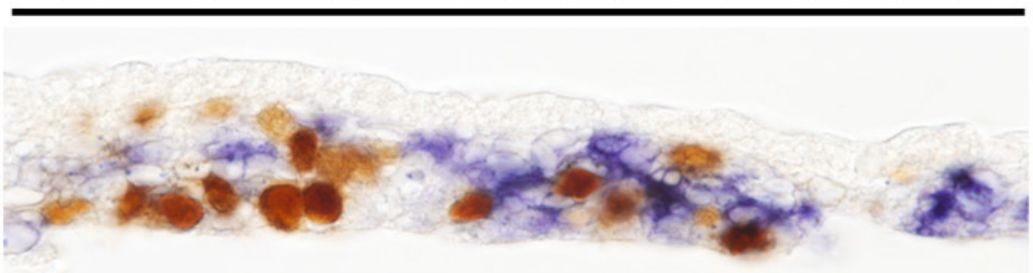

Supplement: dev026906-sup-026906-figs4.pdf [file dev026906-sup-026906-figs4.pdf]
